# Supplementary material
Source: publisher site journal article supplement (https://www.dovepress.com/article/545080)

**Supplementary Table 1. presents the clinical characteristics of AAV patients and three normal controls, along with the follow-up information of certain patients.**

|                                                        | C01 | C02 | C03 | P01    | P02   | P03    | P04    | P05    | P06   | P07    | P08    | P09    | P10    | P11    | P12    |
|--------------------------------------------------------|-----|-----|-----|--------|-------|--------|--------|--------|-------|--------|--------|--------|--------|--------|--------|
| Age(years)                                             | 10  | 12  | 12  | 8.3    | 8.9   | 11.6   | 11.3   | 5      | 13.3  | 14.2   | 7.4    | 17.6   | 19     | 65     | 72     |
| General(female/male)                                   | M   | M   | F   | F      | M     | F      | F      | F      | F     | M      | M      | F      | F      | F      | M      |
| BVAS/PAVAS                                             |     |     |     |        |       |        |        |        |       |        |        |        |        |        |        |
| ANCA levels                                            |     |     |     | MPO+++ | MPO++ | MPO++  | MPO+++ | MPO+   | MPO+  | PR3++  | PR3++  | PR3++  | MPO+++ | PR3+++ | PR3+++ |
| General                                                |     |     |     | 1      | 0     | 0      | 0      | 0      | 0     | 0      | 3      | 3      | 1      | 1      | 0      |
| Cutaneous                                              |     |     |     | 2      | 0     | 0      | 0      | 0      | 0     | 0      | 0      | 0      | 0      | 0      | 0      |
| Mucous membranes & Eyes                                |     |     |     | 1      | 0     | 0      | 0      | 0      | 0     | 0      | 1      | 0      | 0      | 0      | 0      |
| Ear & Nose & Throat                                    |     |     |     | 0      | 0     | 0      | 4      | 0      | 0     | 0      | 0      | 0      | 6      | 0      | 2      |
| pulmonary                                              |     |     |     | 6      | 6     | 6      | 0      | 6      | 0     | 0      | 0      | 0      | 6      | 4      | 4      |
| Cardio-vascular                                        |     |     |     | 0      | 0     | 0      | 0      | 0      | 0     | 0      | 0      | 0      | 4      | 0      | 0      |
| Abdominal                                              |     |     |     | 0      | 0     | 0      | 0      | 0      | 0     | 0      | 0      | 6      | 0      | 0      | 0      |
| Renal                                                  |     |     |     | 0      | 12    | 0      | 6      | 0      | 12    | 10     | 6      | 0      | 0      | 0      | 0      |
| Nervous system                                         |     |     |     | 0      | 0     | 0      | 0      | 0      | 0     | 0      | 0      | 0      | 0      | 0      | 0      |
| Others                                                 |     |     |     | 0      | 0     | 0      | 0      | 0      | 0     | 0      | 0      | 0      | 0      | 0      | 0      |
| Total                                                  |     |     |     | 10     | 18    | 6      | 6      | 10     | 12    | 10     | 10     | 9      | 17     | 5      | 6      |
| C-reactive protein(mg/L)                               |     |     |     | <8     | <8    | <8     | <8     | <8     | <8    | <8     | <8     | <8     | 10.06  | 18.95  | 21.91  |
| Creatinine (μmol/L)                                    |     |     |     | 37     | 266   | 47     | 42     | 29     | 955.8 | 81     | 38     | 58     | 54     | 37     | 1179   |
| eGFR(ml/min/1.73m2)                                    |     |     |     | 176.08 | 25.04 | 155.17 | 178.27 | 179.39 | 6.61  | 103.84 | 166.33 | 128.26 | 238.71 | 144.55 | 185.22 |
| 24-Hours proteinuria(g)                                |     |     |     | 0.134  | 0.468 | 0.004  | 0.011  | 0.024  | /     | 7.746  | 0.023  | 0.03   | /      | /      | /      |
| Urine protein                                          |     |     |     | -      | 2+    | -      | -      | -      | 3+    | 2+     | -      | -      | -      | -      | /      |
| URBC                                                   |     |     |     | 0      | 924   | 0      | 28     | 0      | 92.6  | 260    | 52     | 14     | /      | /      | /      |
| GGT(U/L)                                               |     |     |     | 14     | 6     | 6      | /      | 13     | /     | 28     | 6      | /      | /      | /      | /      |
| Immunosuppressant induction treatment                  |     |     |     |        |       |        |        |        |       |        |        |        |        |        |        |
| Glucocorticoids                                        |     |     |     | +      | +     | +      | /      | +      | /     | +      | +      | /      | /      | /      | /      |
| Rituximab                                              |     |     |     |        | +     | +      | /      |        | /     |        |        | /      | /      | /      | /      |
| Cyclophosphamide                                       |     |     |     | +      | +     |        | /      | +      | /     | +      |        | /      | /      | /      | /      |
| Plasmapheresis                                         |     |     |     | +      | +     | +      | /      |        | /     | +      | +      | /      | /      | /      | /      |
| MMF                                                    |     |     |     |        |       |        | /      |        | /     |        | +      | /      | /      | /      | /      |
| Last follow-up information of patients after treatment |     |     |     |        |       |        |        |        |       |        |        |        |        |        |        |
| C-reactive protein(mg/L)                               |     |     |     | <8     | <8    | <8     | /      | <8     | /     | <8     | <8     | /      | /      | /      | /      |
| Creatinine (μmol/L)                                    |     |     |     | 37     | 168   | 12.96  | /      | 39     | /     | 20     | 21     | /      | /      | /      | /      |
| eGFR(ml/min/1.73m2)                                    |     |     |     | 193.17 | 40.52 | 600.25 | /      | 142.12 | /     | 149.27 | 142.82 | /      | /      | /      | /      |
| 24-Hours proteinuria(g)                                |     |     |     | 0.073  | 0.826 | -      | /      | 0.048  | /     | 0.105  | 0.346  | /      | /      | /      | /      |
| Urine protein                                          |     |     |     | -      | +     | -      | /      | -      | /     | -      | ±      | /      | /      | /      | /      |
| URBC                                                   |     |     |     | 6      | 33    | 0      | /      | 3      | /     | 13     | 0      | /      | /      | /      | /      |
| GGT                                                    |     |     |     | 25     | 15    | 10     | /      | 14     | /     | 34     | 11     | /      | /      | /      | /      |

**Notes:** C, Control; P, Patient; /, not applicable; ANCA, anti-neutrophil cytoplasmic autoantibody; MPO, myeloperoxidase; PR3, proteinase 3; -, Negative; URBC, Urinary Red Blood Cell Count; eGFR, Estimated glomerular filtration rate; GGT, Gamma-glutamyl transpeptidase; MMF, Mycophenolate mofetil.

Single-cell blood samples in the after-treatment group were derived from treated patients (P01, P02, P03). P01, P03, and P05 were samples of the MPO clinical phenotype without kidney injury; P02, P04, and P06 were those with the MPO clinical phenotype and kidney injury. Samples P07-P09 were PR3-ANCA-positive cases, while P10-P12 were adult AAV specimens.

**Supplementary Table 2. Clinical information of AAV patients treated in our hospital, excluding those whose samples were used for single - cell sequencing.**

|                                                        | P01    | P02   | P03    | P04    | P05    | P06    | P07    | P08    | P09   | P10    | P11   | P12    | P13    | P14    | P15    | P16    | P17    | P18    | P19    | P20    | P21    |
|--------------------------------------------------------|--------|-------|--------|--------|--------|--------|--------|--------|-------|--------|-------|--------|--------|--------|--------|--------|--------|--------|--------|--------|--------|
| Age(years)                                             | 12     | 5     | 13     | 11.8   | 11.2   | 12     | 2.5    | 6.9    | 11.7  | 6      | 13    | 12.9   | 14.9   | 9.8    | 7.8    | 12.4   | 12.9   | 3      | 4.6    | 14.7   | 9.9    |
| General(female/male)                                   | M      | M     | F      | F      | F      | F      | F      | M      | F     | M      | F     | F      | F      | M      | M      | F      | F      | M      | F      | F      | M      |
| ANCA levels                                            | MPO++  | MPO+  | MPO+   | MPO+   | MPO+   | MPO+   | GMB+   | PR3+   | MPO+  | MPO+++ | MPO+  | PR3+++ | MPO+++ | PR3+++ | PR3+   | MPO+++ | MPO+   | MPO+++ | MPO+++ | MPO+   | MPO+   |
| BVAS/PAVAS                                             |        |       |        |        |        |        |        |        |       |        |       |        |        |        |        |        |        |        |        |        |        |
| General                                                | 0      | 0     | 0      | 3      | 1      | 1      | 1      | 0      | 0     | 0      | 2     | 1      | 2      | 1      | 0      | 0      | 0      | 0      | 0      | 0      | 1      |
| Cutaneous                                              | 5      | 1     | 0      | 0      | 1      | 1      | 1      | 0      | 0     | 0      | 1     | 0      | 0      | 0      | 0      | 0      | 1      | 0      | 1      | 0      | 0      |
| Mucous membranes & Eyes                                | 2      | 0     | 0      | 0      | 0      | 0      | 0      | 0      | 0     | 0      | 0     | 0      | 2      | 0      | 0      | 0      | 0      | 0      | 0      | 0      | 0      |
| Ear & Nose & Throat                                    | 0      | 0     | 0      | 4      | 0      | 0      | 0      | 0      | 0     | 0      | 2     | 4      | 2      | 2      | 0      | 4      | 0      | 0      | 0      | 0      | 0      |
| pulmonary                                              | 0      | 0     | 0      | 0      | 0      | 0      | 0      | 0      | 0     | 4      | 6     | 6      | 0      | 0      | 0      | 0      | 0      | 6      | 0      | 6      | 0      |
| Cardio-vascular                                        | 0      | 0     | 0      | 0      | 0      | 0      | 0      | 0      | 0     | 0      | 0     | 0      | 0      | 0      | 0      | 0      | 0      | 0      | 0      | 0      | 0      |
| Abdominal                                              | 0      | 0     | 0      | 0      | 0      | 0      | 0      | 0      | 0     | 0      | 0     | 0      | 0      | 0      | 0      | 0      | 0      | 0      | 0      | 0      | 0      |
| Renal                                                  | 12     | 12    | 10     | 12     | 6      | 6      |        | 10     | 12    | 6      | 12    | 12     | 6      | 6      | 12     | 12     | 6      | 6      | 12     | 6      | 6      |
| Nervous system                                         | 0      | 0     | 0      | 0      | 0      | 0      | 0      | 0      | 0     | 0      | 0     | 0      | 0      | 0      | 0      | 0      | 0      | 0      | 0      | 0      | 0      |
| Others                                                 | 0      | 0     | 0      | 0      | 0      | 0      | 0      | 0      | 0     | 0      | 0     | 0      | 0      | 0      | 0      | 0      | 0      | 0      | 0      | 0      | 0      |
| Total                                                  | 19     | 13    | 10     | 19     | 8      | 8      | 2      | 10     | 12    | 10     | 23    | 27     | 12     | 9      | 12     | 12     | 7      | 12     | 13     | 12     | 7      |
| C-reactive protein(mg/L)                               | 8      | 11    | <8     | 8      | 18     | 43     | 8      | <8     | 8     | <8     | 11    | <8     | 31     | <8     | 8.72   | <8     | <8     | 9.87   | <8     | /      | 11.61  |
| Creatinine (μmol/L)                                    | 91     | 438   | 96     | 151    | 34     | 49     | 27     | 25     | 154   | 42     | 132   | 53     | 49     | 36     | 160    | 260    | 62     | 24     | 37     | 46     | 43     |
| eGFR(ml/min/1.73m2)                                    | 80.14  | 11.32 | 82.55  | 49.91  | 200.2  | 143.88 | 151.26 | 246.99 | 48.94 | 127.33 | 55.99 | 146.78 | 150.82 | 191.78 | 41.02  | 28.42  | 130.96 | 198.53 | 139.29 | 170.17 | 163.95 |
| 24-Hours proteinuria(g)                                | 1.203  | 0.09  | 8.66   | 1.386  | 0.26   | /      | /      | /      | 5.08  | 0.25   | 2.12  | 0.177  | 0.272  | 0.107  | 1.107  | 3.438  | 0.291  | /      | 0.394  | 0.516  | 0.289  |
| Urine protein                                          | 1+     | 3+    | 3+     | 2+     | 1+     | 1+     | -      | 3+     | 2+    | 1+     | 2+    | -      | 1+     | -      | 2+     | 3+     | -      | -      | 2      | -      | 1+     |
| URBC                                                   | 630    | 4307  | 112    | 1146   | 33     | 10     | 0      | 2948   | 430   | 44     | 74    | 483    | 39     | 30     | 13662  | 1134   | 41     | 139    | 864    | 0      | 543    |
| GGT(U/L)                                               | 8      | 7     | 21     | 10     | 14     | 12.3   | 9      | 6      | 14.2  | 9      | 6     | 45     | 10     | 10     | 6      | 9      | 10     | 10     | 7      | 6      | 12     |
| Immunosuppressant induction treatment                  |        |       |        |        |        |        |        |        |       |        |       |        |        |        |        |        |        |        |        |        |        |
| Glucocorticoids                                        | +      | +     | +      | +      | +      | +      | +      | +      | +     | +      | +     | +      | +      | +      | +      | +      | +      | +      | +      | +      | +      |
| Rituximab                                              | +      | +     |        | +      |        |        |        | +      |       |        |       |        |        | +      | +      | +      | +      | +      | +      | +      | +      |
| Cyclophosphamide                                       | +      | +     | +      | +      |        | +      |        |        | +     | +      | +     | +      | +      |        |        | +      |        |        |        | +      |        |
| Plasmapheresis                                         | +      |       |        | +      | +      |        |        |        |       | +      | +     | +      |        |        |        | +      |        | +      |        |        |        |
| MMF                                                    |        |       |        | +      |        |        |        |        | +     |        |       |        |        |        |        |        |        |        |        |        |        |
| Last follow-up information of patients after treatment |        |       |        |        |        |        |        |        |       |        |       |        |        |        |        |        |        |        |        |        |        |
| C-reactive protein(mg/L)                               | <8     | /     | <8     | <8     | <8     | /      | /      | <8     | /     | <8     | <8    | <8     | 23     | <8     | <8     | <8     | <8     | <8     | <8     | <8     | <8     |
| Creatinine (μmol/L)                                    | 101    | 132   | 47     | 47     | 46     | 99.2   | 29     | 33     | 218   | 43     | 110   | 72     | 48     | 35     | 50     | 381    | 63     | 34     | 32     | 44     | 44     |
| eGFR(ml/min/1.73m2)                                    | 103.54 | 47.88 | 170.69 | 165.51 | 163.83 | 71.07  | 144.18 | 191.53 | 34.57 | 133.42 | 66.3  | 109.39 | 153.96 | 201.42 | 131.27 | 19.39  | 128.88 | 143    | 161    | 177.91 | 160.25 |
| 24-Hours proteinuria(g)                                | 1.38   | /     | 1.1    | 0.121  | 0.15   | 0.58   | 0.03   | /      | /     | 0.131  | 2.533 | /      | 0.03   | 0.046  | /      | 6.624  | 0.172  | /      | 0.45   | 0.146  | 0.218  |
| Urine protein                                          | 1+     | -     | -      | 2+     | -      | 1+     | -      | -      | 3+    | -      | 1+    | 1+     | -      | -      | -      | 3+     | -      | -      | -      | -      | -      |
| URBC                                                   | 0      | 1     | 0      | 73     | 0      | 1      | 7      | 2070   | 36    | 0      | 12    | 8      | 7      | 0      | 0      | 438    | 0      | 0      | 0      | 0      | 6      |
| GGT                                                    | 10     | 29    | 79     | 15     | 10     | 15     | 10     | 11     | 17.9  | 13     | 13    | 76     | 21     | 16     | 11     | 15     | 11     | 19     | 16     | 9      | 19     |

**Notes:** P, Patient; /, not applicable; ANCA, anti-neutrophil cytoplasmic autoantibody; MPO, myeloperoxidase; PR3, proteinase 3;GBM,Glomerular basement membrane; -, Negative; URBC, Urinary Red Blood Cell Count; eGFR, Estimated glomerular filtration rate; GGT, Gamma-glutamyl transpeptidase; MMF, Mycophenolate mofetil.

Supplementary Figure 1. UMAP plots of immune cells derived from 18 samples.

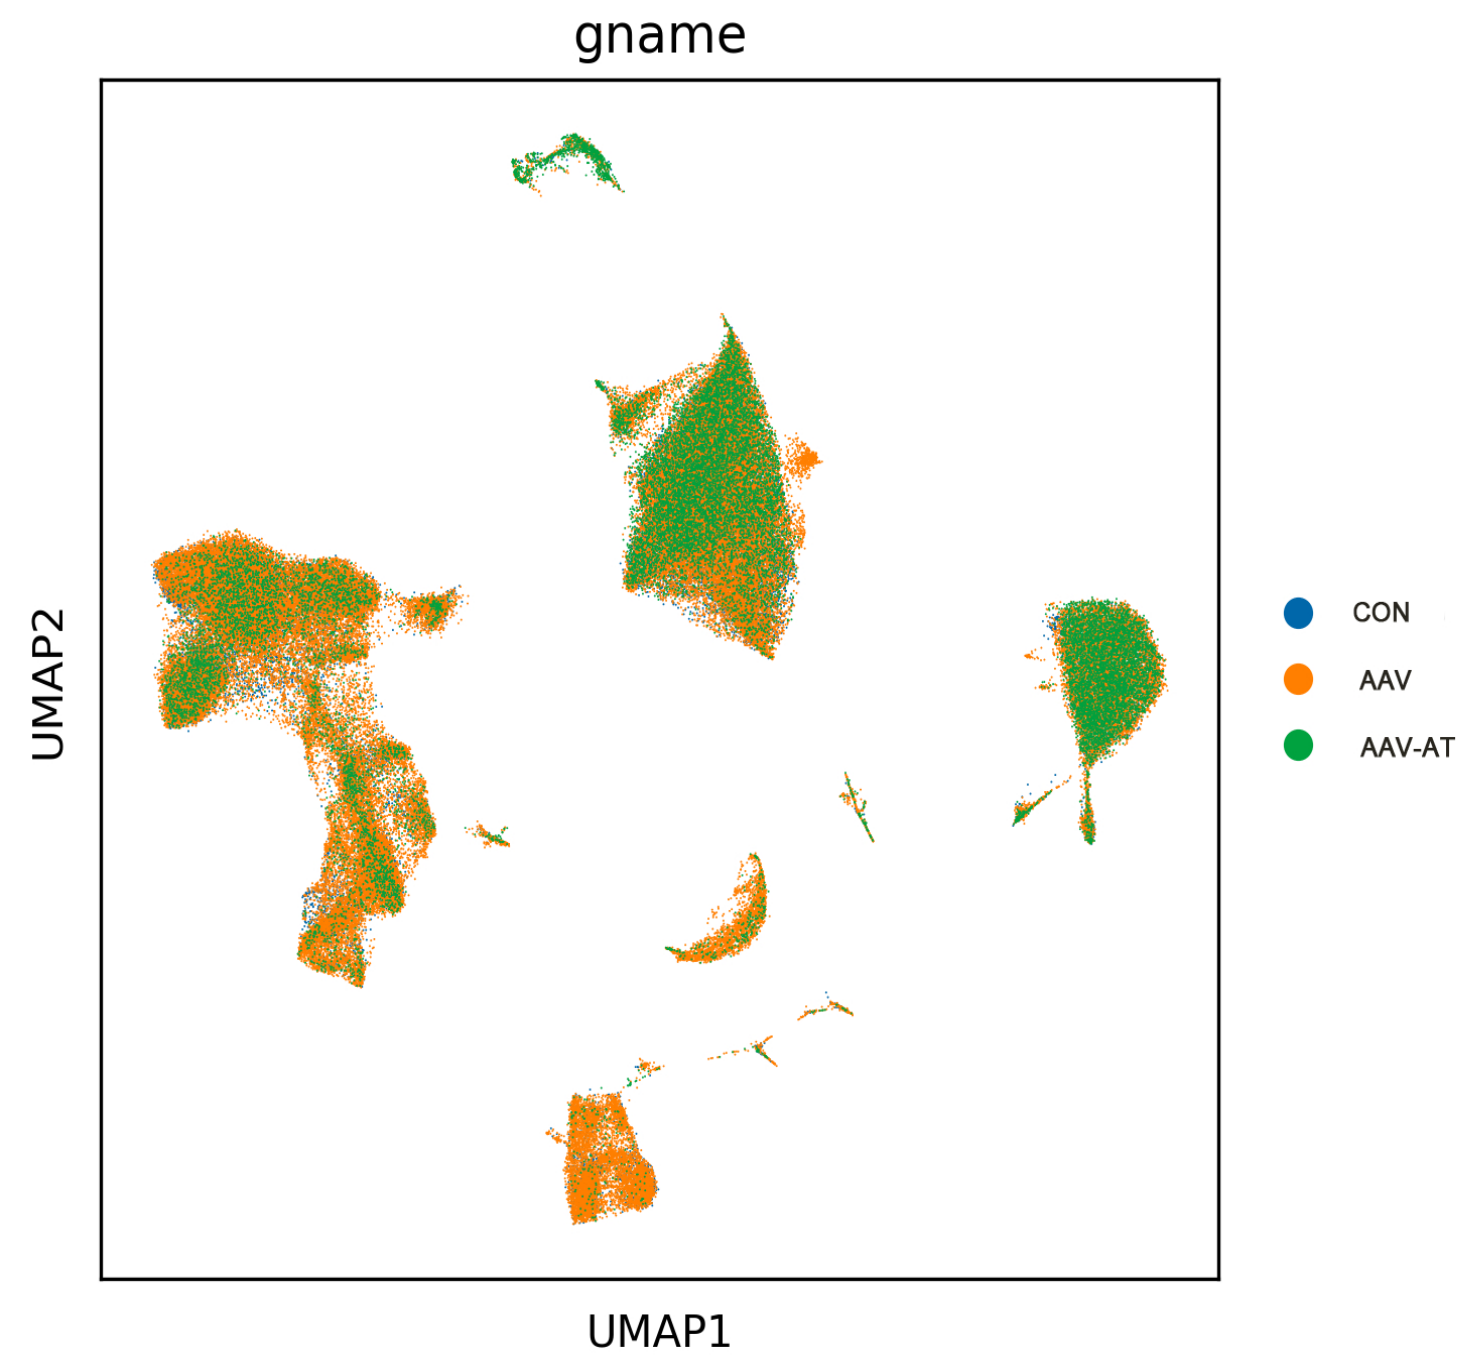

The UMAP displays single-cell data of immune cells obtained from 18 samples(CON group: Blue; AAV group:Yellow; AAV-AT: Green).

Supplementary Figure 2. UMAP plots of neutrophil cells derived from 18 samples.

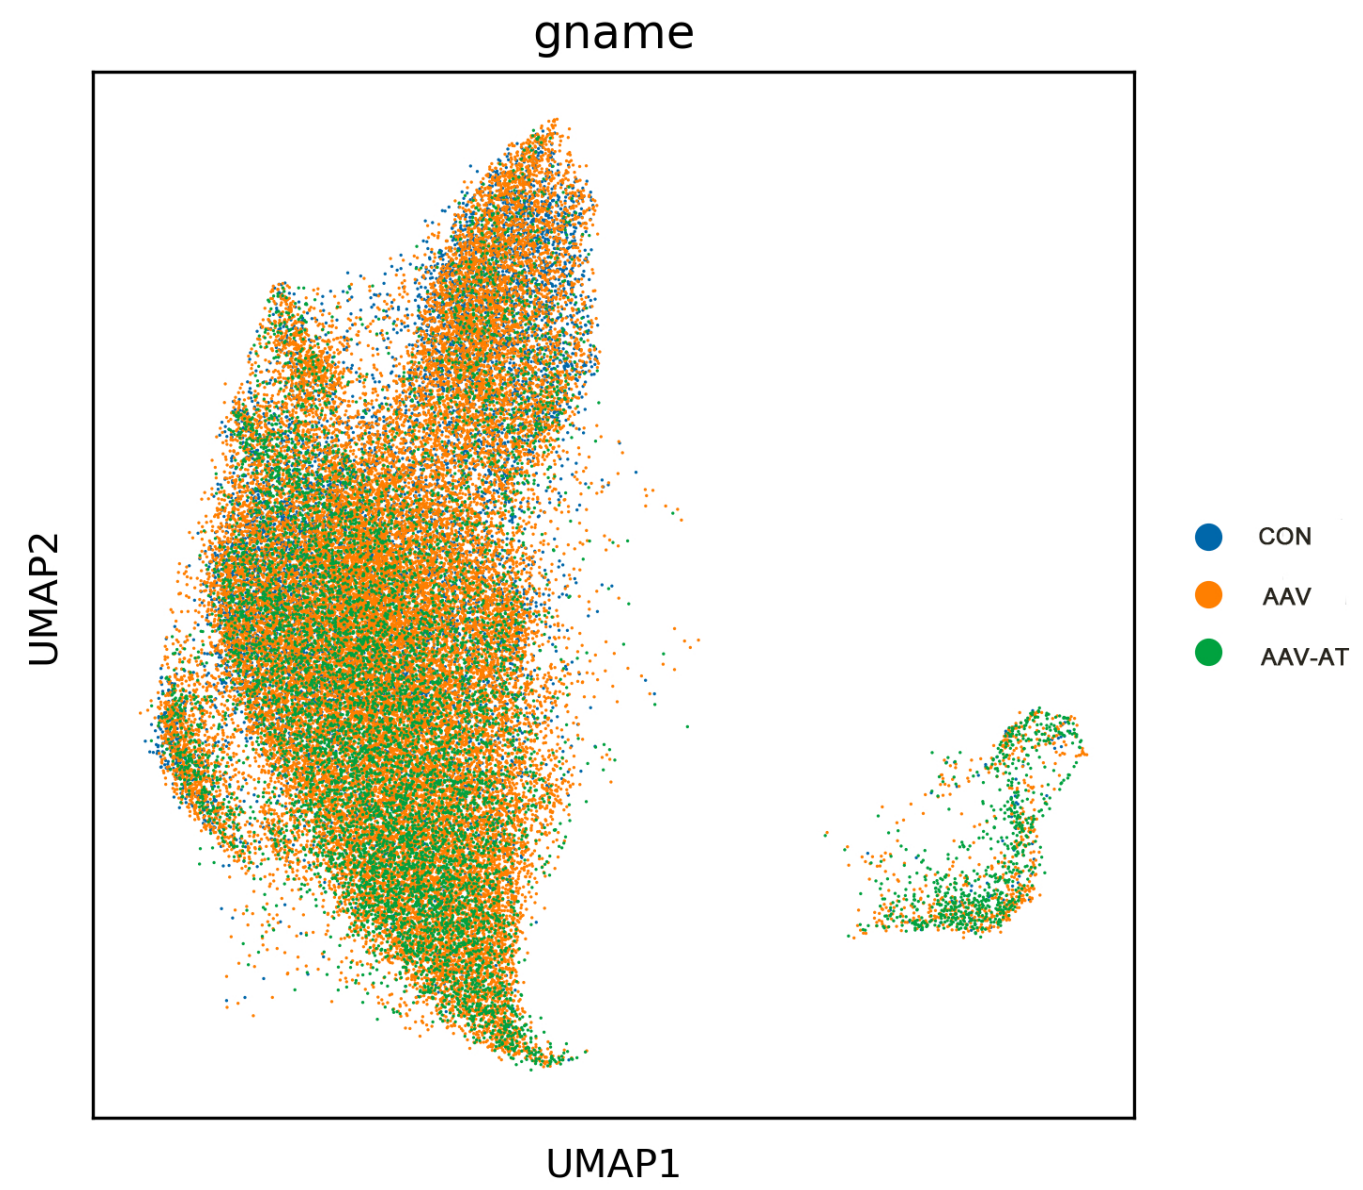

The UMAP displays single-cell data of neutrophil cells obtained from 18 samples(CON group: Blue; AAV group:Yellow; AAV-AT: Green).

Supplementary Figure 3. Association network diagram for enrichment analysis of differentially expressed genes by comparing the CON and AAV groups of clusters (CD10<sup>+</sup>CD11B<sup>++</sup>neutrophils).

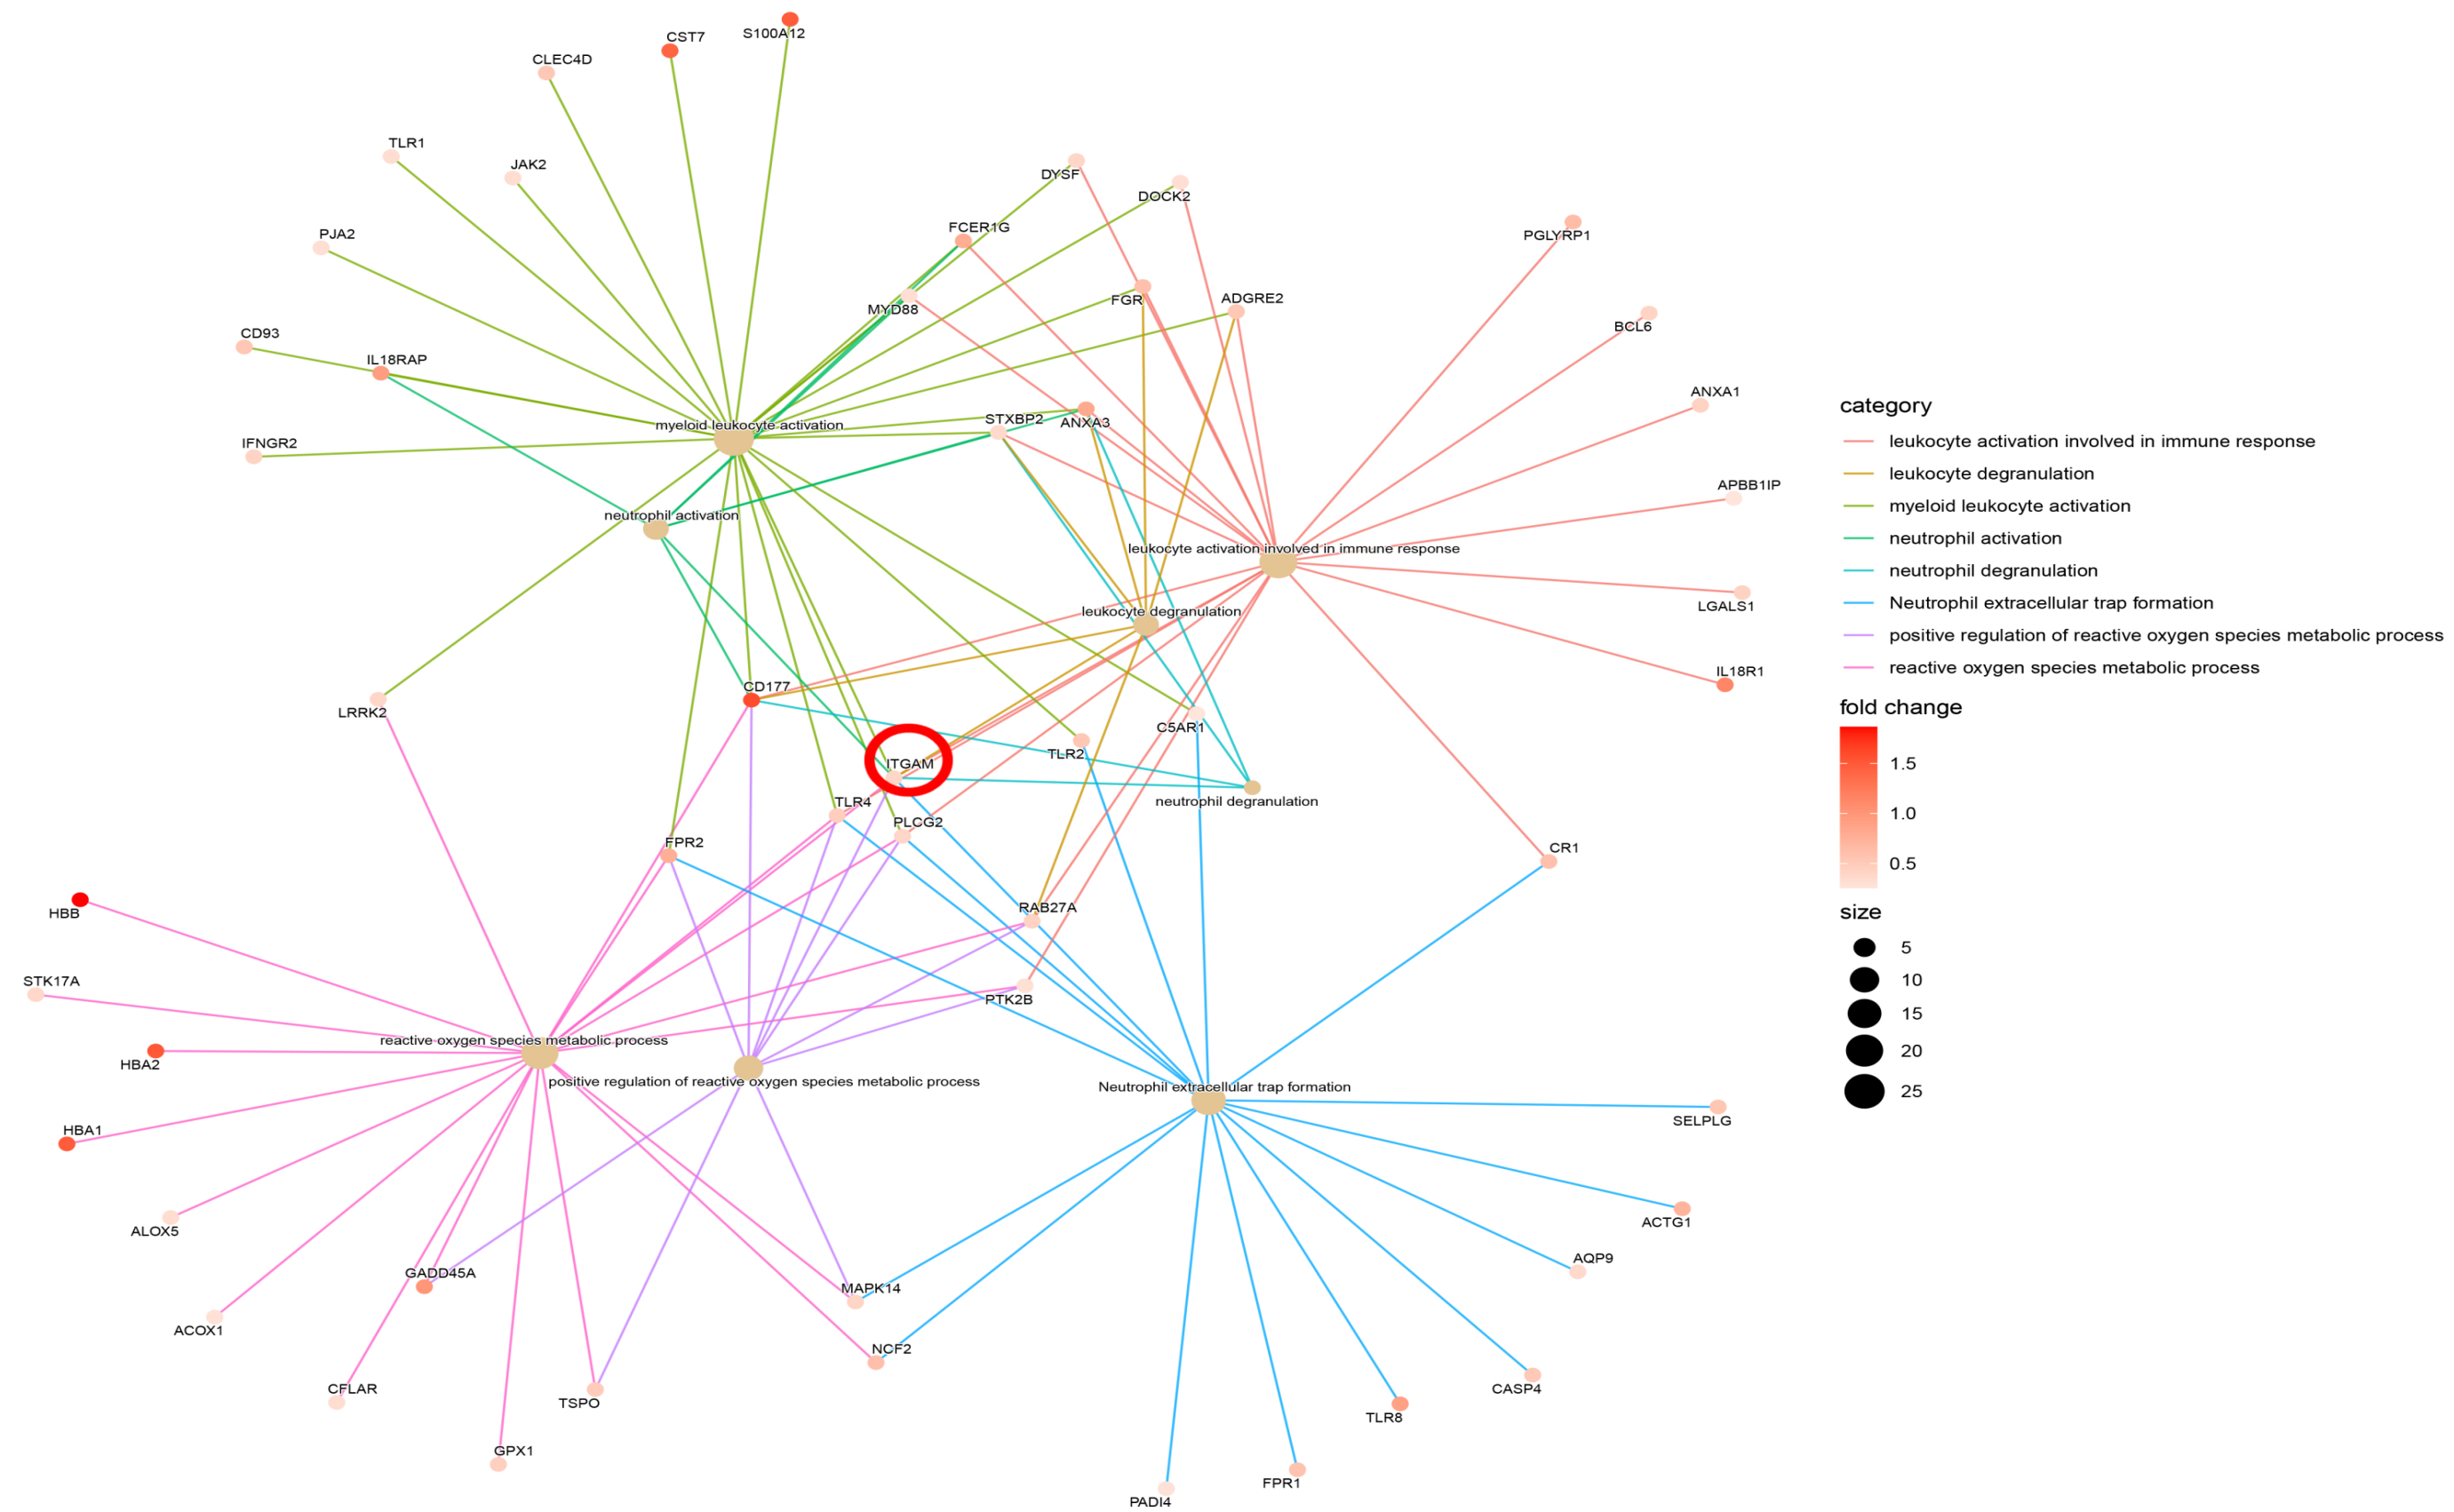

The large dots represent pathways, with the dot size indicating the number of genes. The small dots represent genes, and the redder the color, the higher the expression level. The connecting lines indicate that a gene belongs to the corresponding pathway. The area circled in red highlights the gene ITGAM.

Supplementary Figure 4. Association network diagram for enrichment analysis of differentially expressed genes by comparing the CON and AAV groups of clusters (CD10-CD11B<sup>++</sup>neutrophils).

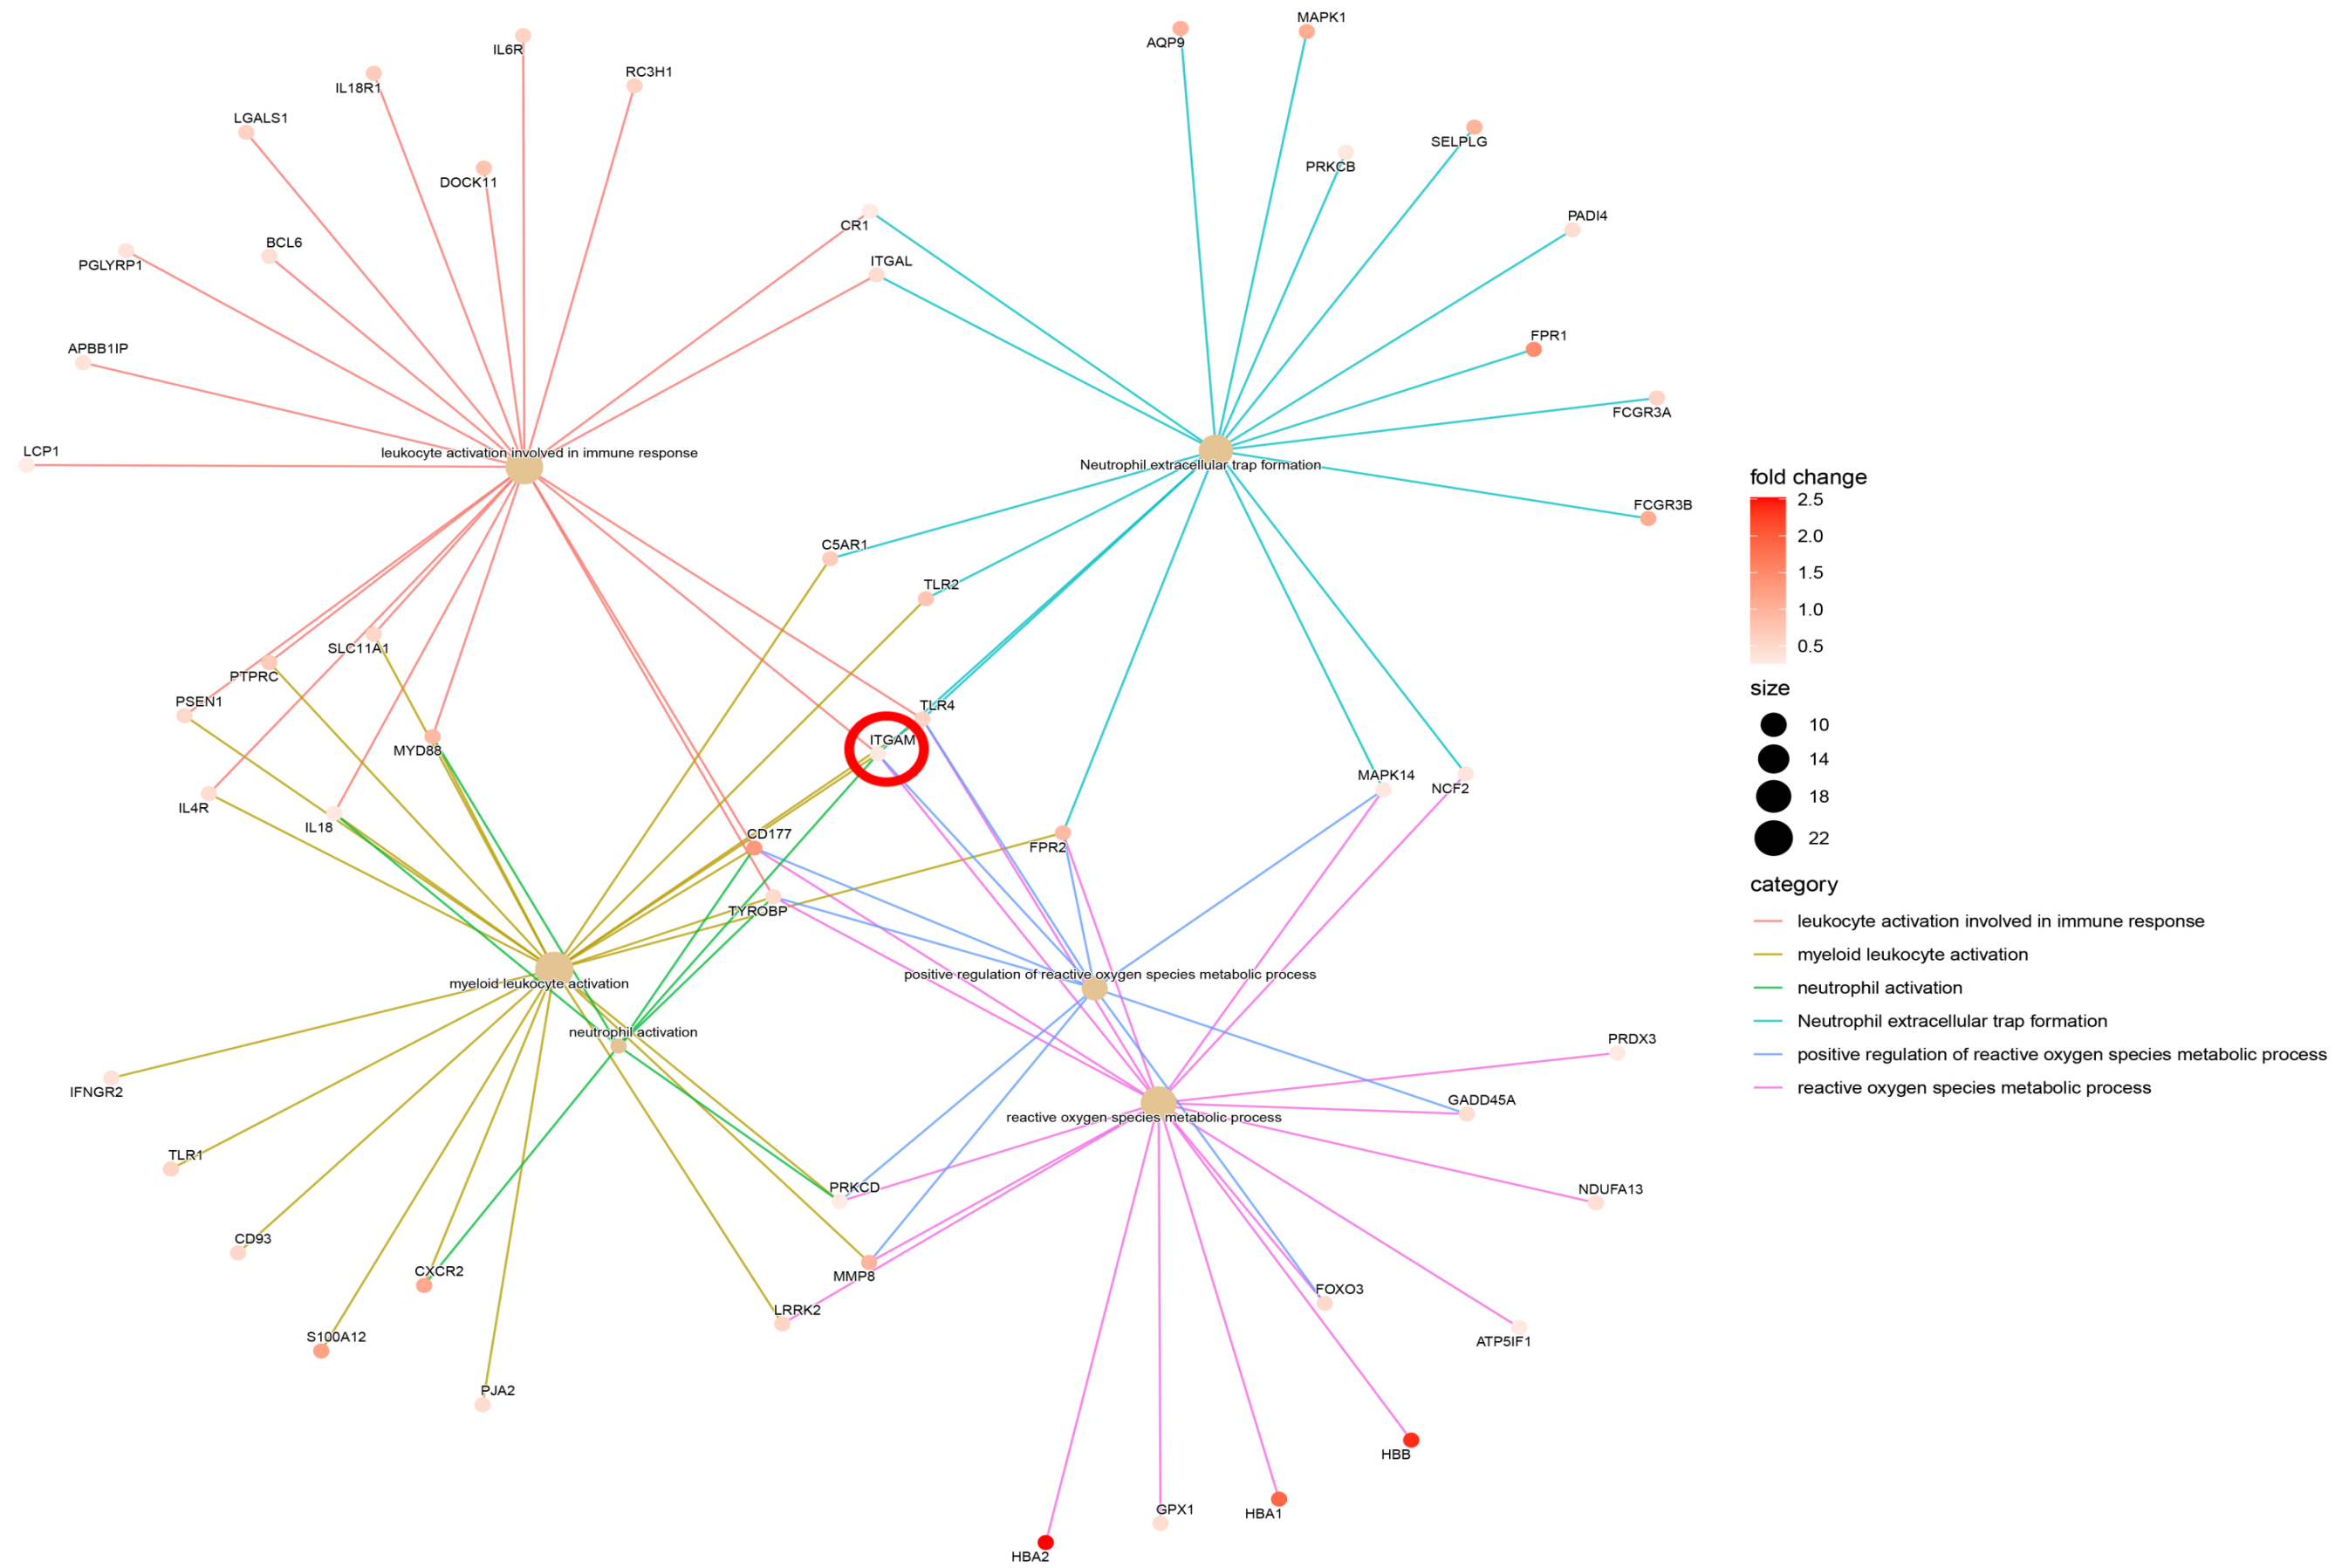

The large dots represent pathways, with the dot size indicating the number of genes. The small dots represent genes, and the redder the color, the higher the expression level. The connecting lines indicate that a gene belongs to the corresponding pathway. The area circled in red highlights the gene ITGAM.

Supplementary Figure 5. Flow cytometry plots and fluorescence data of peripheral blood samples disease model group (N=3) are provided.

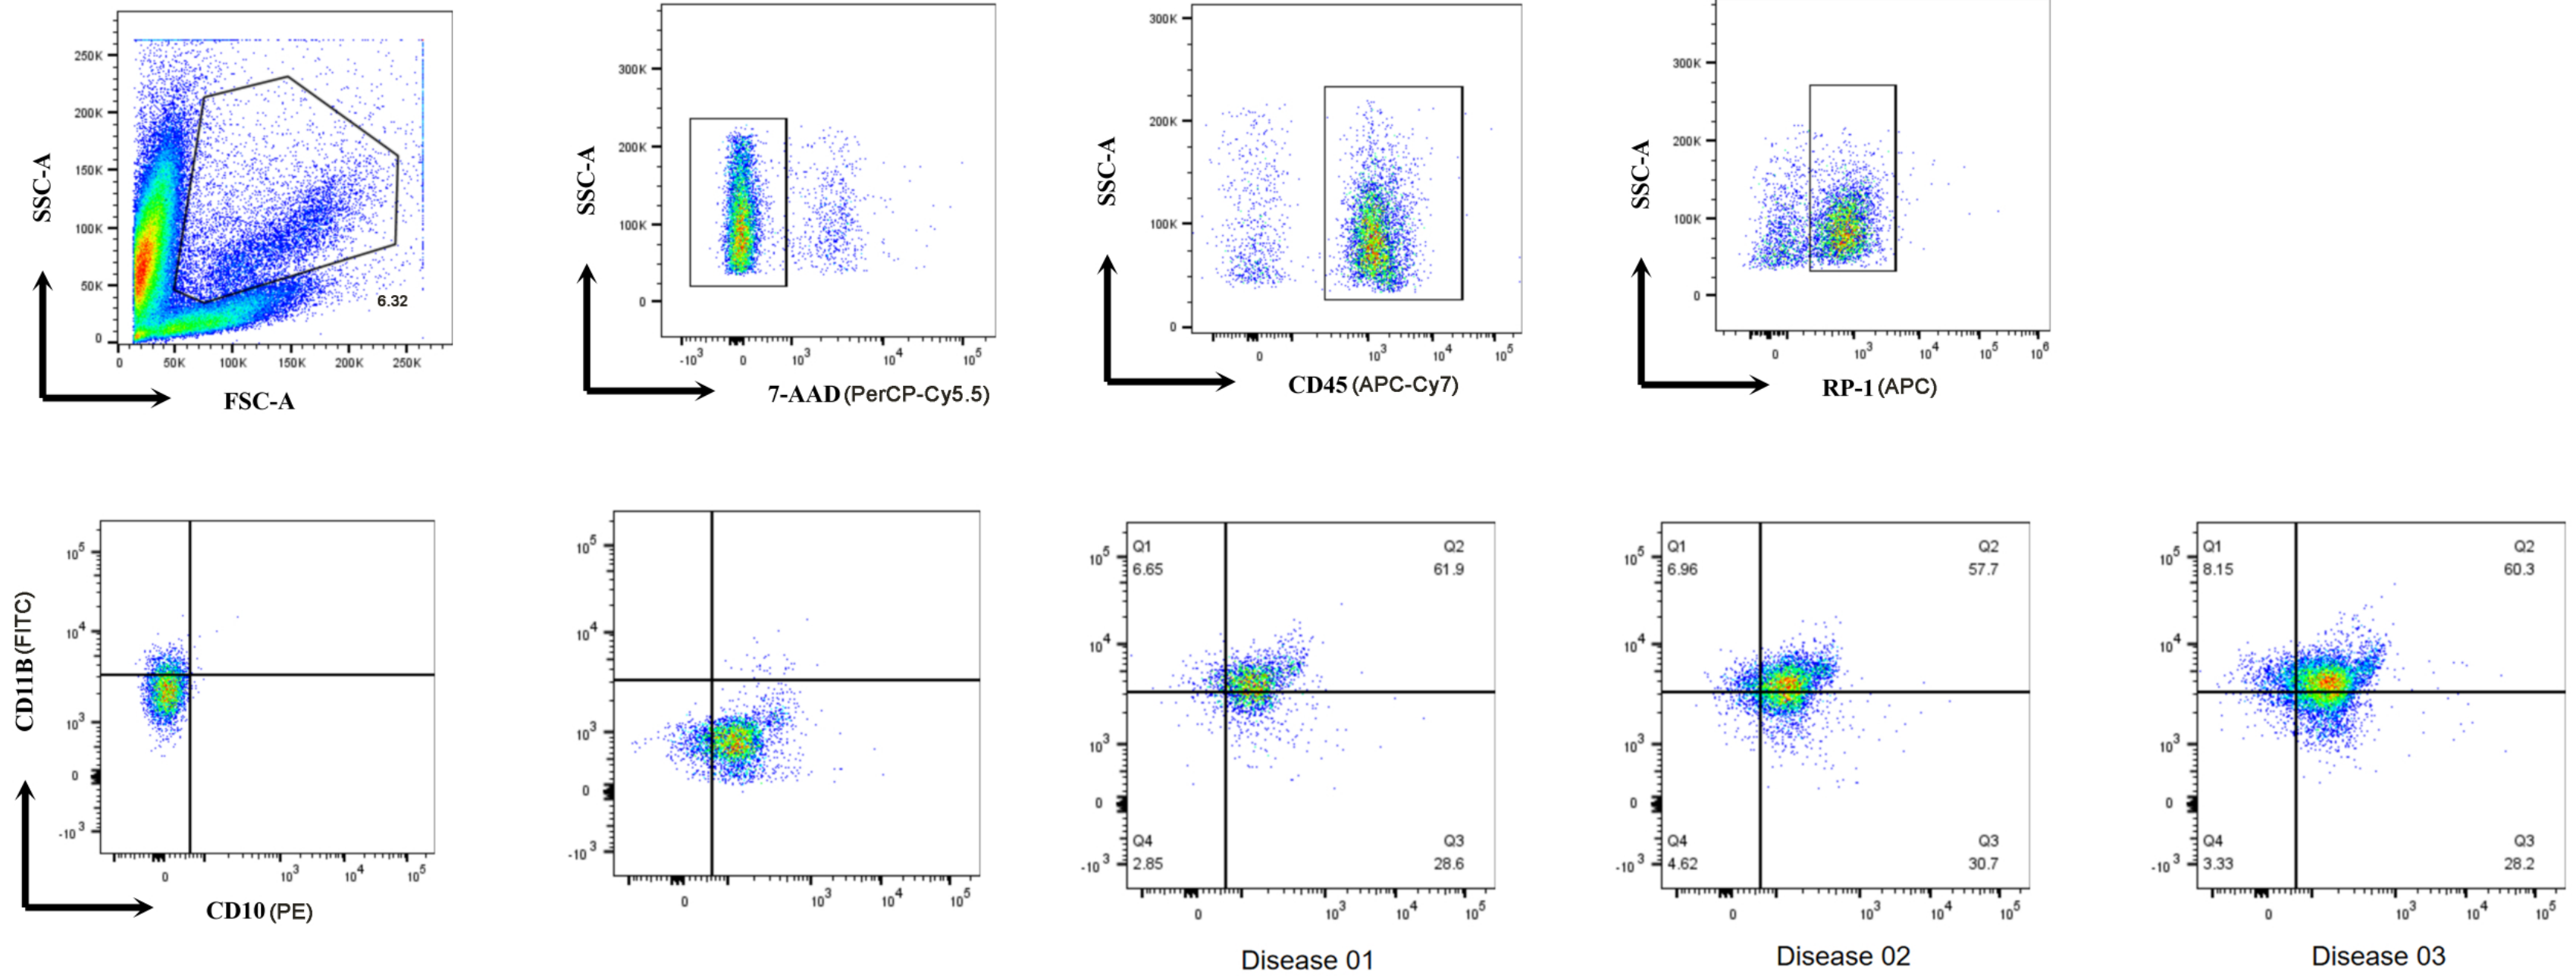

Supplement: Supplementary file 1 [file 545080%20Supplementary%20Materials.pdf]
